# Supplementary material for: Multi-objective collaborative design optimized highly efficient energy capacitive lead-free relaxor ferroelectrics
Source: Royal Society of Chemistry journal article supplement (doi:10.1039/d3ta03946c), 2023-01-01
Supplement: d3ta03946c1.pdf [file d3ta03946c1.pdf]

## Supporting Information

### Multi-objective collaborative design optimized highly efficient energy capacitive lead-free relaxor ferroelectrics

Long Lin,<sup>a</sup> Chongyang Li,<sup>a</sup> Yibo Zhang,<sup>a</sup> Wangfeng Bai,<sup>a,b\*</sup> Shiting Wu,<sup>a</sup> Yongjun  
Yuan,<sup>a</sup> Wei Li,<sup>c</sup> Jiwei Zhai<sup>d\*</sup>

<sup>a</sup> College of Materials and Environmental Engineering, Hangzhou Dianzi University,  
No. 2 Street, Hangzhou 310018, China

<sup>b</sup> Key Laboratory of Novel Materials for Sensor of Zhejiang Province, Hangzhou  
Dianzi University, Hangzhou 310012, China

<sup>c</sup> School of Materials Science and Engineering, Liaocheng University, Liaocheng  
252059, China

<sup>d</sup> Functional Materials Research Laboratory, School of Materials Science &  
Engineering, Tongji University, No. 4800 Caoan Highway, Shanghai, 201804, China

\* Corresponding author. E-mail address: bwfcxj@126.com (W. Bai),  
apzhai@tongji.edu.cn (J. Zhai).

## Experimental section

### Ceramic preparation:

$(1-x)[0.955(\text{Bi}_{0.5}\text{Na}_{0.5}\text{TiO}_3)-0.045\text{Ba}(\text{Al}_{0.5}\text{Ta}_{0.5})\text{O}_3]-x\text{NaTaO}_3$  (abbreviated as BNT-BAT- $x$ NT,  $x=0.05, 0.1, 0.15, 0.2$ ) ceramics were prepared by conventional solid phase method with high purity  $\text{Bi}_2\text{O}_3$ ,  $\text{Na}_2\text{CO}_3$ ,  $\text{TiO}_2$ ,  $\text{BaCO}_3$ ,  $\text{Al}_2\text{O}_3$ ,  $\text{Ta}_2\text{O}_5$  ( $\geq 99\%$ ) as raw materials. The above powders were weighed according to stoichiometric ratio and ball milled for 24 h. The obtained BNT-BAT powders were calcined at 850 °C for 6 h, and the NT powders were calcined at 800 °C for 4 h. Then the BNT-BAT and NT powders were mixed and ball milled for 48 h. The resulting powders were mixed with 8 wt% organic binders (PVA) for granulation, and then pressed into pellets with a diameter of 10 mm and a thickness of 1 mm. Ultimately, the pressed disks were sintered at 1125-1175 °C for 2 h.

### Structure characterizations:

The X-ray diffractometer (XRD; MiniFlex600, Rigaku, Japan) and Raman spectra (Horiba/Jobin Yvon, Villeneuve d'Ascq, France) were employed to analyze the phase structure. The sample microstructure was observed by the field emission scanning electron microscope (FE-SEM, S-4200, Hitachi, Tokyo, Japan). The domain morphology and high-resolution atomic imaging of ceramics were observed via field emission transmission electron microscopy (TEM; FEI Talos F200X, USA) at an accelerated voltage of 200 kV. To collect domain morphology and dynamic response, Piezoresponse force microscopy (PFM) measurements of ceramics were performed using an atomic force microscopy (AsylumResearch MFP-3D).

### Electrical properties:

To perform energy storage measurements, the sintered ceramics were grinded and polished to approximate 50-80  $\mu\text{m}$  in thickness and then sputtered with gold electrodes. The polarization hysteresis ( $P$ - $E$ ) loops with respect to temperature, frequency, cycles and the FORC loops were measured via an FE test system (RT1-Premier II, Radiant Technologies InC, USA). The temperature and frequency dependence of dielectric constant and loss were examined using a high-precision LCR meter (HP 4990 A;

Agilent, Palo Alto, CA). The charging-discharging performance of ceramic capacitors was estimated via a commercial charge-discharge platform (CFD-003, Gogo Instruments Technology, China) with a certain discharge resistance, inductance, and capacitance load circuit. The absorption spectrum was collected using an ultraviolet spectrophotometer (TU-1901, Beijing Purkinje General Instrument, China).

### The FORC distribution:

In this work,  $E_{\max}$  is set to be 80 kV/cm,  $\Delta\alpha = \Delta\beta = \Delta E = 4$  kV/cm. An approximate method to calculate  $p(\alpha, \beta)$  is

$$p(\alpha, \beta) = \frac{1}{2} \frac{\partial^2 p^2(\alpha, \beta)}{\partial \alpha \partial \beta} \quad \#(1)$$

where  $p(\alpha, \beta)$  is the polarization of the FORC loop,  $\alpha$  is the reversal electric field, and  $\beta$  is the real electric field<sup>1</sup>.

### Finite Element Simulation:

To better understand the dielectric breakdown process, finite element analysis was used to simulate the distributions of electric potential, electric field, and polarization with the evolution of the electrical tree. According to the experimental SEM images, two-dimensional simulation model was established. The probability of the electrical tree channels was calculated using the following equation<sup>2,3</sup>:

$$p(i', j' \rightarrow i, j) = \frac{(\phi_{i', j'} - \phi_{i, j} - \phi)^m}{\sum (\phi_{i', j'} - \phi_{i, j} - \phi)^m} + (\phi_{i', j'} - \phi_{i'', j''} - \phi)^m - loss \quad \#(2)$$

where  $\phi_{i, j}$ ,  $\phi_{i', j'}$  and  $\phi_{i'', j''}$  represent the electrical potential of the discharged point, probable point, and linked point, respectively.  $\phi$  is the threshold electrical potential of the ceramic for grain and grain boundary.  $m$  is the fractal dimension.  $loss$  denotes the evolution loss of the tip electrical tree channels.

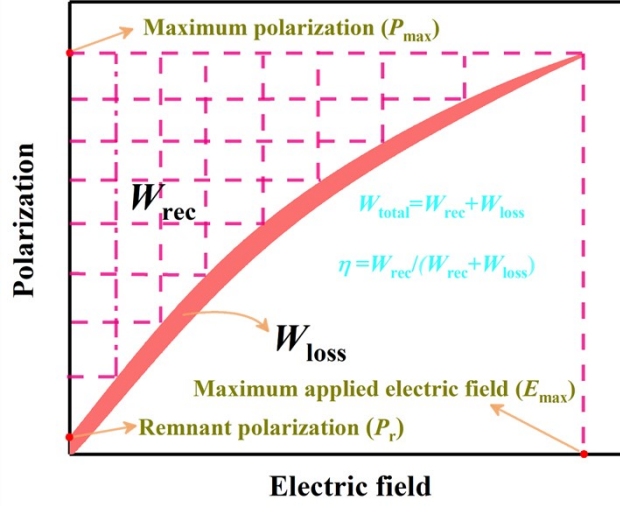

**Fig. S1** Graphical representation of polarization-electric field ( $P$ - $E$ ) hysteresis loop for energy-storage calculation.

The total energy density ( $W_{total}$ ), recoverable energy density ( $W_{rec}$ ), and energy efficiency ( $\eta$ ) of dielectric capacitors can be calculated by the three formulas, which are expressed as follows <sup>4, 5</sup>:

$$W_{total} = \int_0^{P_{max}} E dp \# (3)$$

$$W_{rec} = \int_{P_r}^{P_{max}} E dp \# (4)$$

$$\eta = \frac{W_{rec}}{W_{total}} \times 100\% \# (5)$$

where  $P_{max}$ ,  $P_r$ , and  $E$  denote the maximum polarization, remnant polarization, and electric field strength, respectively. As shown in Fig. S1, in order to achieve excellent ESP, the  $P_{max}$  and breakdown strength ( $E_b$ ) must be improved, and  $P_r$  must be reduced while delaying the saturation polarization <sup>6, 7</sup>.

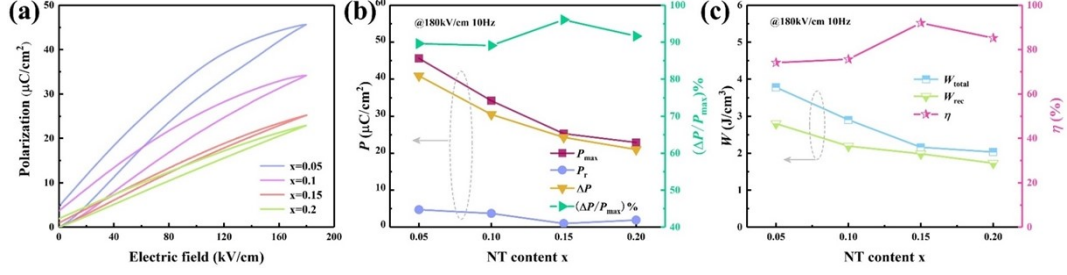

**Fig. S2** (a) Unipolar  $P$ - $E$  loops, (b) changes of  $P_{\max}$ ,  $P_r$ ,  $\Delta P$  and  $\Delta P/P_{\max}$ , and (c)  $W_{\text{total}}$ ,  $W_{\text{rec}}$  and  $\eta$  of the BNT-BAT- $x$ NT ceramics under 180 kV/cm and 10 Hz.

In order to determine the phase transition, the unipolar  $P$ - $E$  curves of BNT-BAT- $x$ NT ceramics are recorded under 180 kV/cm and 10 Hz. Obviously, with the increase of NT content, the  $P$ - $E$  curve gradually becomes slender, and  $P_{\max}$  and  $P_r$  decrease at the same time, indicating the disrupted long-range ferroelectric order and decreased energy loss. For  $x=0.05$ , the phase structure is NR-ER phase at room temperature, leading to high  $P_{\max}$ , large  $P_r$ , obvious hysteresis, and significantly early polarization saturation. In the case of  $x=0.15$ , the room temperature phase structure is dominated ER, which can disrupt long-range ferroelectric order and induce PNRs, thus generating a slim  $P$ - $E$  loop with an ultralow  $P_r$ , a relatively high  $P_{\max}$ , and significantly delayed polarization saturation. In consequence, the  $P_{\max}$  decreases markedly for  $x \geq 0.15$ . Furthermore,  $\Delta P/P_{\max}$  under 180 kV/cm for  $x=0.15$  behaves a highest value compared with other compositions, which is the key contribution of polarization. Excitingly, the smallest  $P_r$  ( $< 1 \mu\text{C}/\text{cm}^2$ ) and the largest  $\Delta P/P_{\max}$  (%) ( $> 95\%$ ) while maintaining a large  $\Delta P$  ( $> 20 \mu\text{C}/\text{cm}^2$ ) are realized simultaneously in  $x=0.15$  ceramic, resulting in the optimized  $W_{\text{rec}}$  and  $\eta$ .

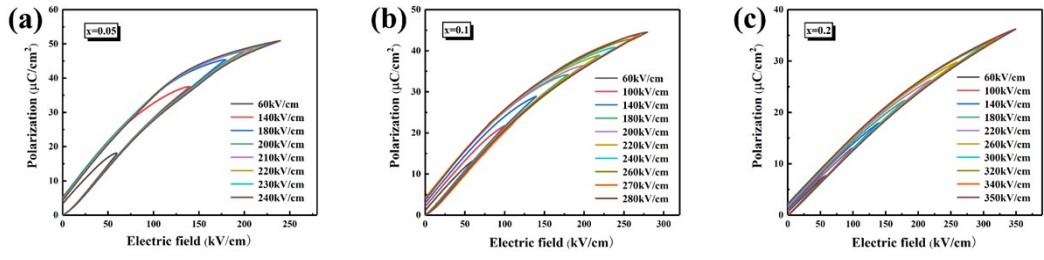

**Fig. S3** *P-E* loops measured at 10 Hz for BNT-BAT-xNT ceramics: (a)  $x = 0.05$ , (b)  $x = 0.1$ , and (c)  $x = 0.2$ .

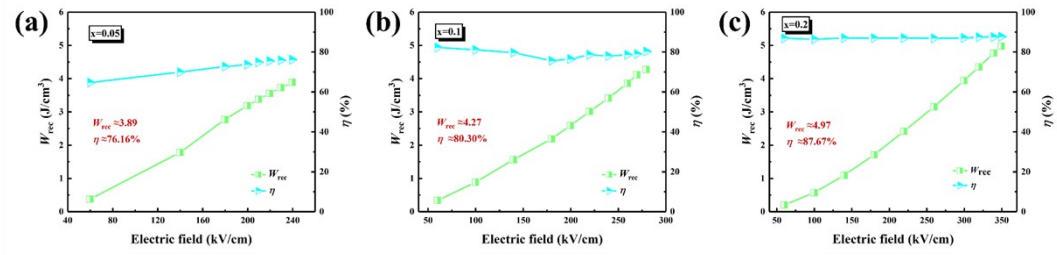

**Fig. S4** The  $W_{rec}$  and  $\eta$  for BNT-BAT-xNT ceramics: (a)  $x = 0.05$ , (b)  $x = 0.1$ , and (c)  $x = 0.2$ .

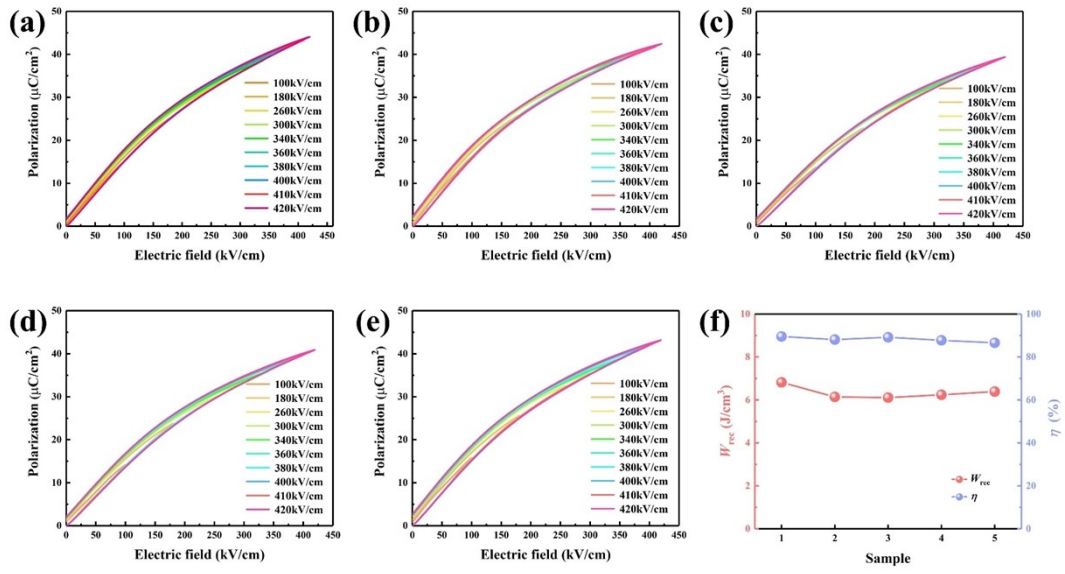

**Fig. S5** (a)-(e)  $P$ - $E$  loops of five  $x=0.15$  ceramics, and (f) the corresponding variation of  $W_{\text{rec}}$  and  $\eta$  of five samples.



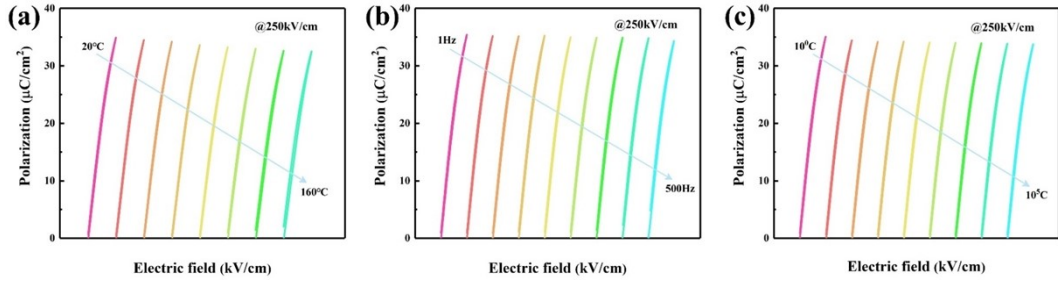

**Fig. S6** (a) Temperature-, (b) frequency-, and (c) cycle number- dependent unipolar  $P$ - $E$  loops measured under 250 kV/cm for  $x=0.15$  ceramic.

Clearly, the  $W_{\text{rec}}$  and  $\eta$  keep stable in the whole frequency range. On the one hand, this is mainly linked with the reduced loss resulted from the weakening of polarization relaxation phenomenon at low frequency (see Fig. 4(g))<sup>8</sup>. As demonstrated in Fig. 5, the weakly coupled PNRs would generate a fast response of each PNR during electric field loading, leading to near-zero  $P_r$  and high  $\eta$  with frequency<sup>9</sup>. On the other hand, as shown in Fig. 4(h), dielectric constant decreases with increasing frequency, which can reduce the  $P_{\text{max}}$  values and thus produce a slight reduction in  $W_{\text{rec}}$  (see Fig. 3(b)). As a result, the  $\eta$  keeps stable and the  $W_{\text{rec}}$  decreases slightly with increasing the frequency.

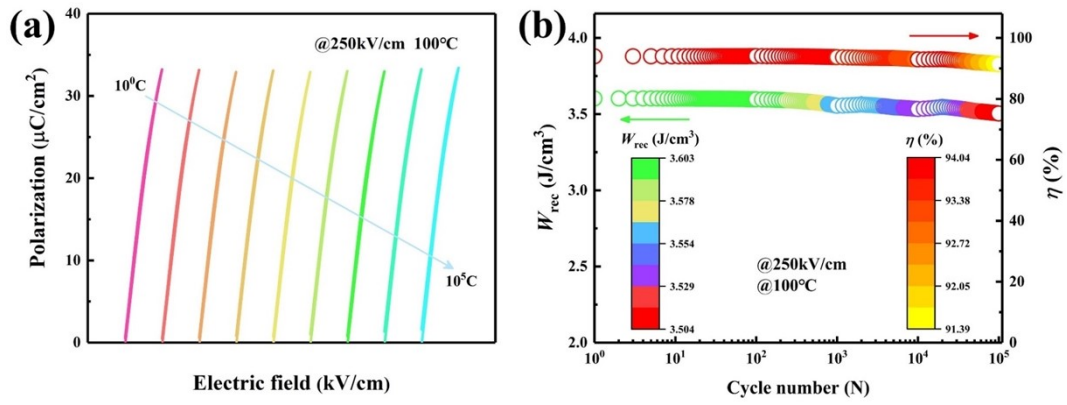

**Fig. S7** (a) The cycle number dependence of unipolar  $P$ - $E$  loops, and (b)  $W_{\text{rec}}$  and  $\eta$  measured under 250 kV/cm and 100 °C up to  $10^5$  cycles for  $x=0.15$  ceramic.

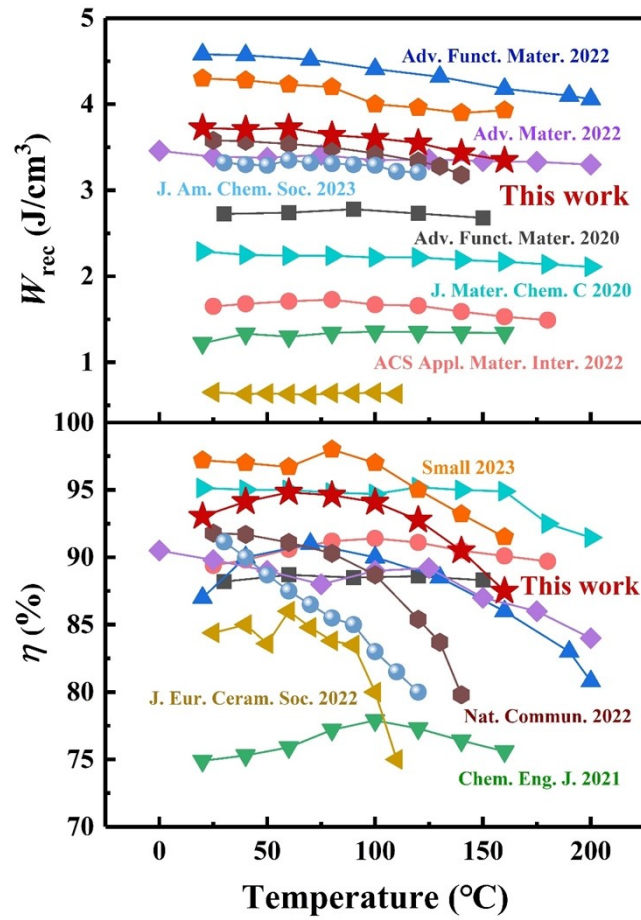

**Fig. S8** A comparison of temperature stability of  $W_{\text{rec}}$  and  $\eta$  in various representative lead-free energy storage ceramics. The references are listed in Table S2.

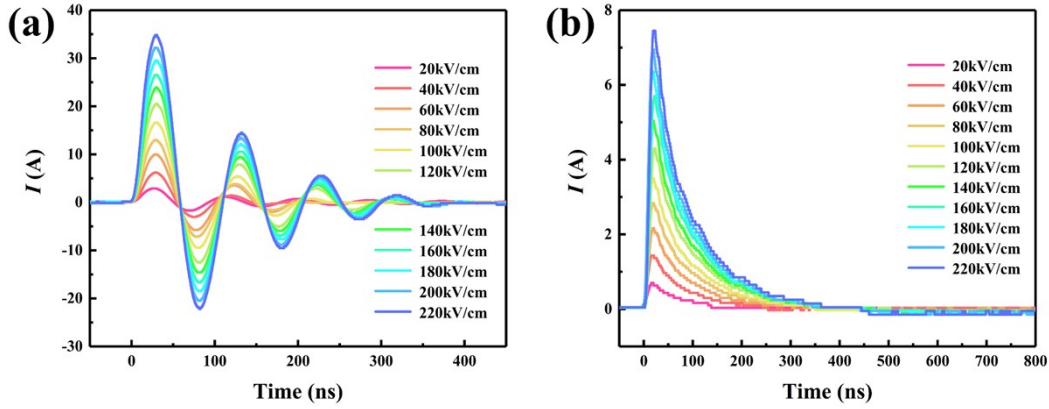

**Fig. S9** (a) Underdamped discharge waveforms and (b) overdamped discharge waveforms for  $x=0.15$  ceramic.

Fig. S9 shows underdamped and overdamped discharge waveforms for  $x=0.15$  ceramic. As shown in Fig. 2(d) and Fig. 3(e), it has a certain degree of difference between  $W_d$  and  $W_{rec}$ , namely, the  $W_d$  measured in the RC circuit is smaller than  $W_{rec}$  measured by the  $P-E$  loop under the same electric field. On the one hand, the observed difference is mainly caused by the different mechanisms of the two measurements (quasistatic  $P-E$  loop,  $10^{-1}$  s; dynamic discharge measurement,  $10^{-5}$  s)<sup>10</sup>. On the other hand, the equivalent series resistor, domain walls movement and measurement frequency also generate the loss of discharged energy<sup>11</sup>. In consequence, the difference between  $W_d$  and  $W_{rec}$  is available in dielectric materials.

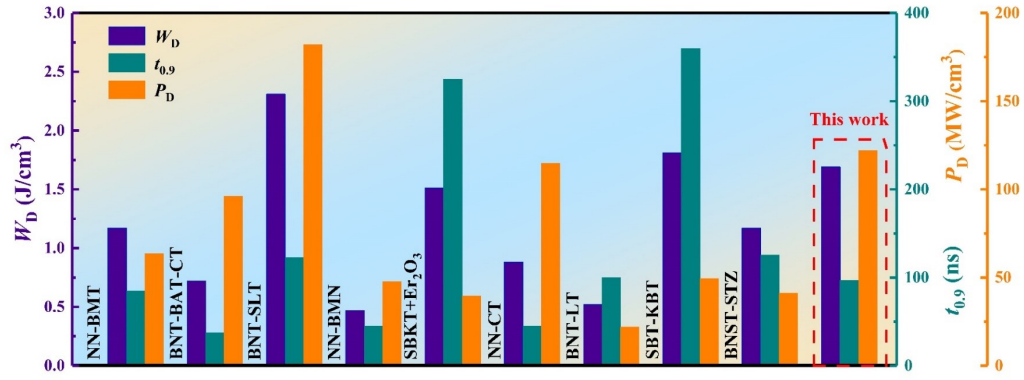

**Fig. S10** A comparison of  $W_D$ ,  $t_{0.9}$ , and  $P_D$  among the  $x=0.15$  ceramic and other representative lead-free systems. The references are listed in Table S3.

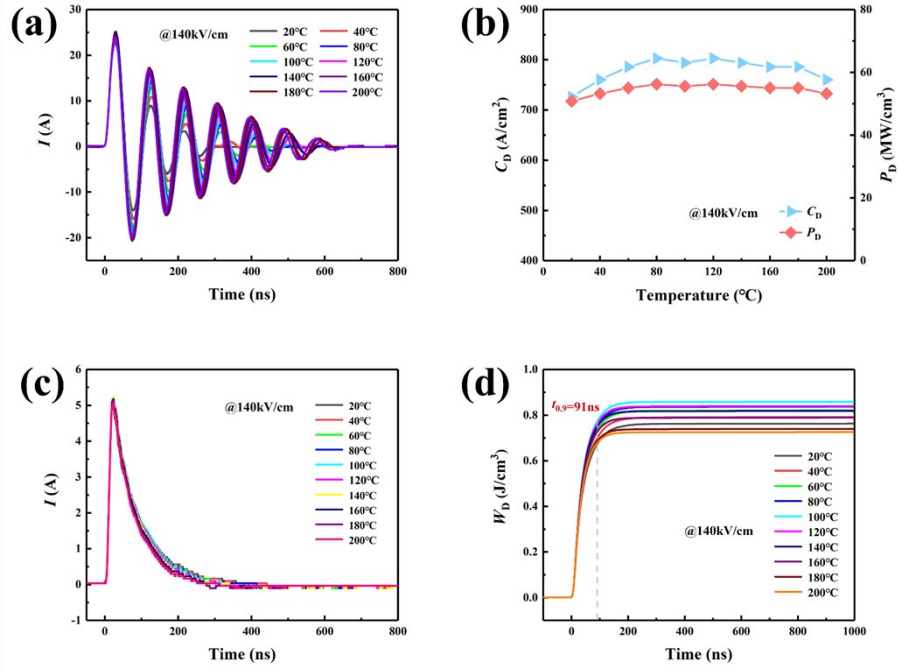

**Fig. S11** Temperature-dependent (a) underdamped discharge curves, (b) the changes in  $C_D$  and  $P_D$  at different temperatures, (c) overdamped discharge curves, and (d)  $W_D$ - $t$  curves for  $x=0.15$  ceramic.

The current density ( $C_D$ ) and power density ( $P_D$ ) of the sample can be expressed by the following equations<sup>12, 13</sup>:

$$C_D = \frac{I_{max}}{S} \#(6)$$

$$P_D = \frac{EI_{max}}{2S} \#(7)$$

where  $I_{max}$ ,  $S$  and  $E$  are the first current peak amplitude, electrode area, and electric field strength, respectively. The discharge energy density ( $W_D$ ) can be calculated by the following equation<sup>9, 14</sup>:

$$W_D = \frac{R \int I^2(t) dt}{V} \#(8)$$

where  $R$  and  $V$  are the total load resistor (200  $\Omega$ ) and the sample effective volume, respectively. With the increase of temperature (20-200°C), relatively stable underdamped and overdamped waveforms can still be observed. At the same time, the sample maintains a high  $P_D$  ( $\geq 50.8$  MW/cm<sup>3</sup>) and a very short  $t_{0.9}$  ( $\leq 91$  ns) at 140 kV/cm, and the change is very small at high temperatures, showing excellent thermal stability of charge/discharge performance.

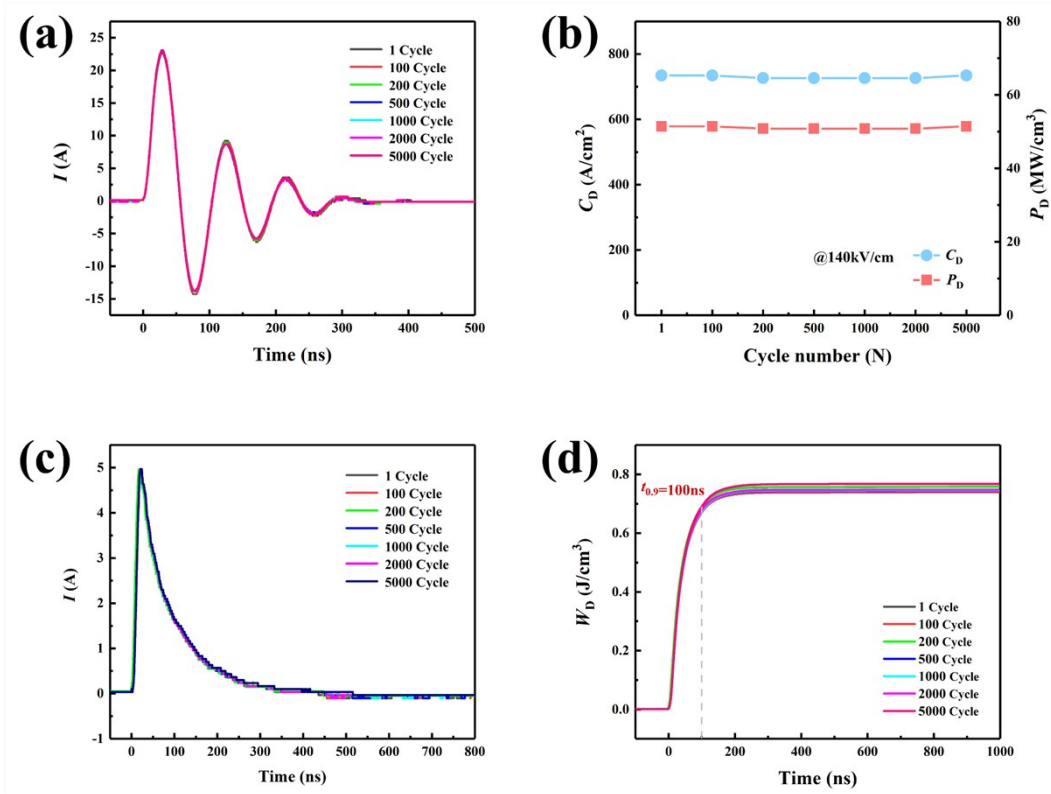

**Fig. S12** Cycles-dependent (a) underdamped discharge curves, (b) the changes in  $C_D$  and  $P_D$ , (c) overdamped discharge curves, and (d)  $W_D$ -t curves for x=0.15 ceramic.

After 5000 cycles, the underdamped and overdamped curves of the sample are almost unchanged. A high  $P_D$  and a short  $t_{0.9}$  can still be maintained. These experimental results show that x=0.15 ceramic has high fatigue reliability.

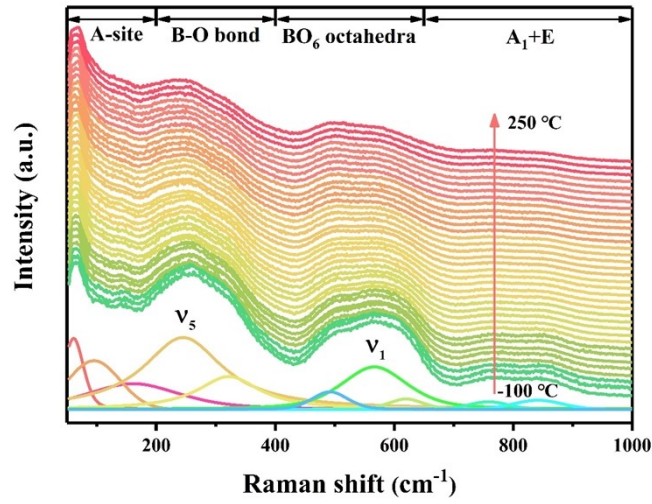

**Fig. S13** Evolution of Raman spectra and fitting results for  $x=0.15$  ceramic measured at various temperatures.

Depending on the modes of vibration, the Raman spectra can be separated into four sections ( $< 200$ ,  $200-400$ ,  $400-650$ , and  $> 650 \text{ cm}^{-1}$ )<sup>15</sup>.



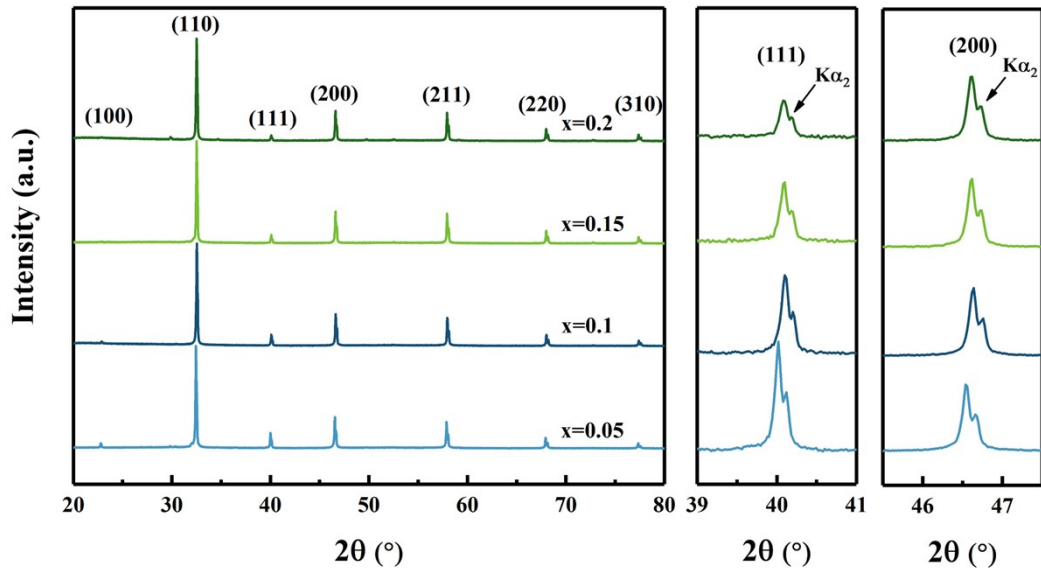

**Fig. S14** XRD patterns and enlarged (111) and (200) peaks for BNT-BAT-xNT ceramics.

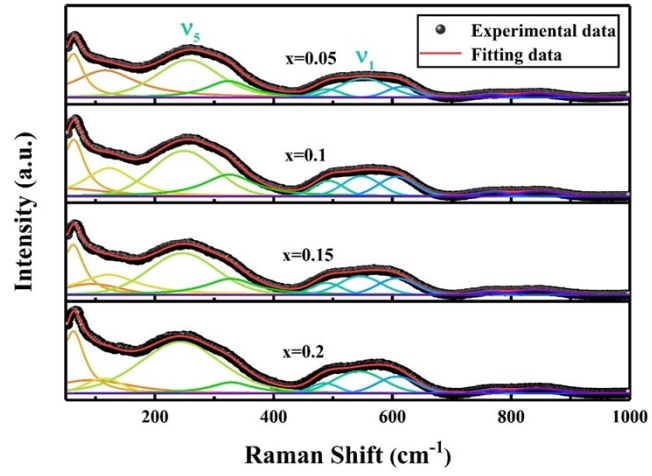

**Fig. S15** Raman spectra of BNT-BAT-xNT ceramics.

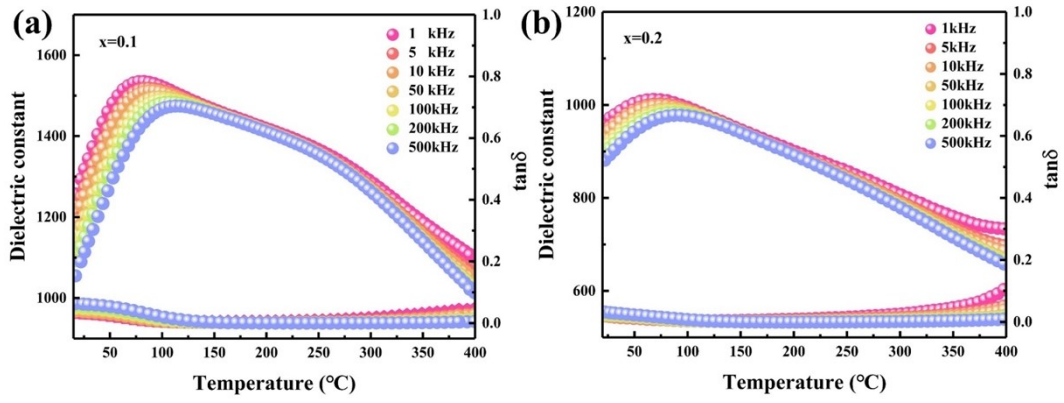

**Fig. S16** Temperature dependence of dielectric constant and loss of BNT-BAT-xNT ceramics at various frequencies: (a)  $x=0.1$  and (b)  $x=0.2$ .

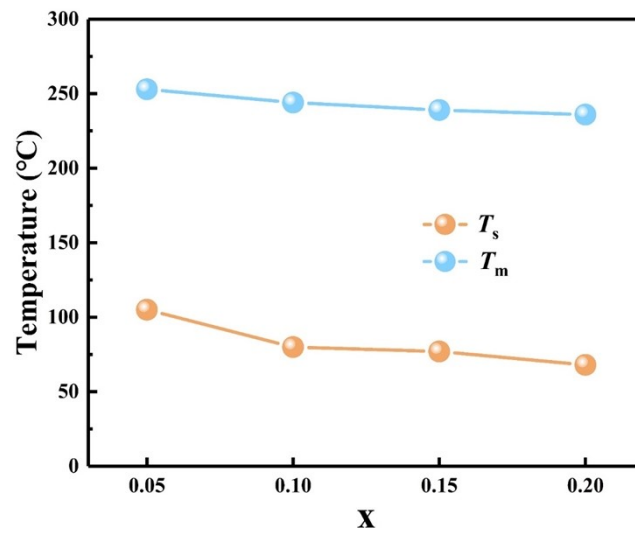

**Fig. S17** Phase diagram for BNT-BAT-xNT ceramics.

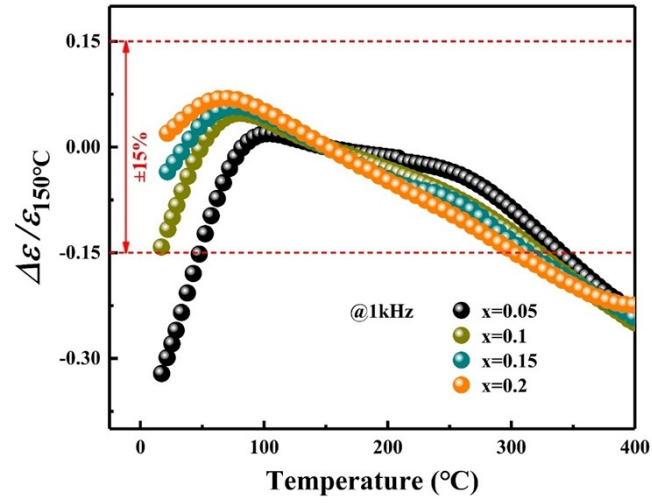

**Fig. S18** The thermal stability of dielectric constant ( $\Delta\epsilon/\epsilon_{150^\circ\text{C}}$ ) for BNT-BAT-xNT ceramics at 1 kHz.

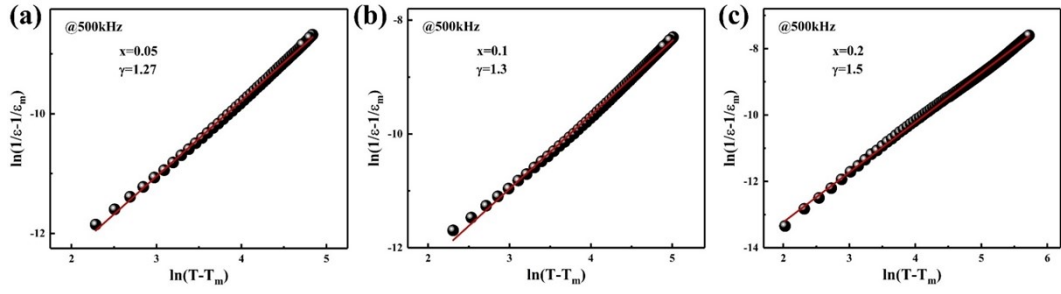

**Fig. S19** Diffusion coefficient for BNT-BAT-xNT ceramics: (a)  $x=0.05$ , (b)  $x=0.1$ , and (c)  $x=0.2$ .

The correctional Curie-Weiss relationship is used to more precisely characterize the dielectric relaxation characteristics of the ceramic, and it shows as follows <sup>16</sup>:

$$\frac{1}{\epsilon_r} - \frac{1}{\epsilon_m} = \frac{(T - T_m)^\gamma}{C} \#(9)$$

where  $\epsilon_m$  represents the maximum  $\epsilon_r$ ,  $C$  is the constant, and  $\gamma$  ( $1 \leq \gamma \leq 2$ ) denotes diffuseness coefficient.

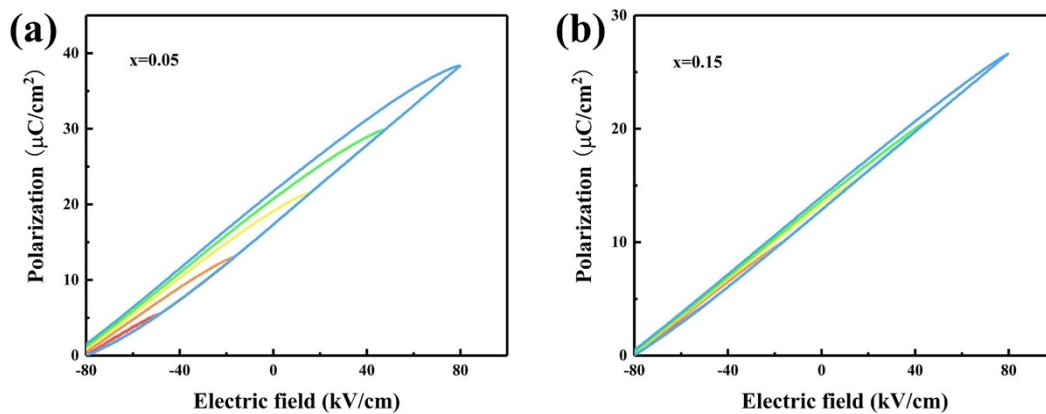

**Fig. S20** FORC loops for (a)  $x=0.05$ , and (b)  $x=0.15$  ceramic. Only 5 out of the 40 total loops are presented.

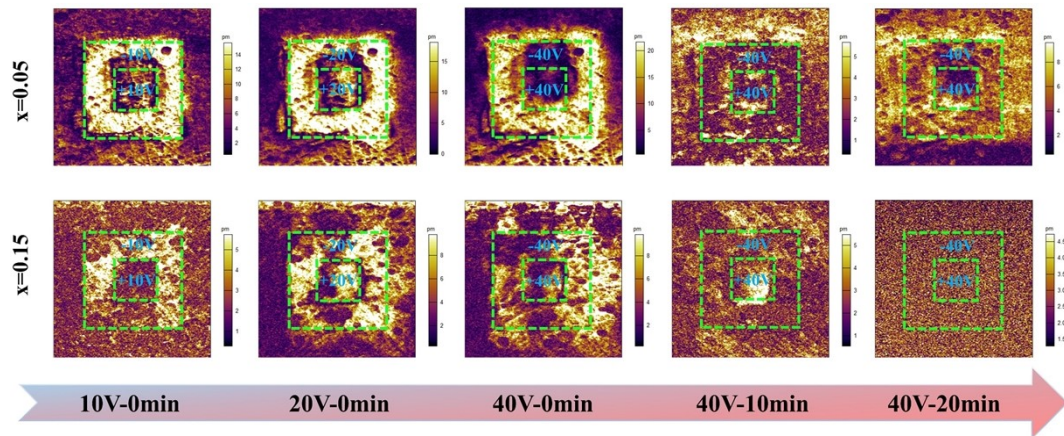

**Fig. S21** Out-of-plane PFM amplitude images for indicated ceramics.

Fig. S21 shows the out-of-plane PFM amplitude in the scanning areas of  $5 \times 5 \mu\text{m}^2$  at different voltages (10V, 20V, 40V) and different relaxation durations (0min, 10min, 20min). A negative DC voltage with different amplitude (-10 V, -20 V, -40V) was applied to the tip of the sample with an area of  $3 \times 3 \mu\text{m}^2$ , and then the same positive DC voltage was imposed on the inner  $1 \times 1 \mu\text{m}^2$  area to explore the polarization switching behavior.



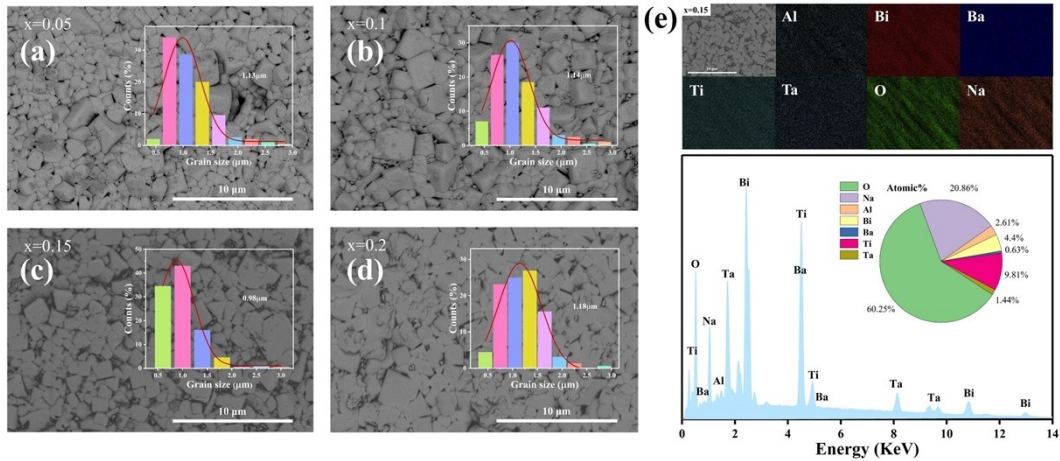

**Fig. S22** (a-d) The surface morphology and corresponding grain size distribution of as-sintered BNT-BAT-xNT ceramics; (e) Energy spectrum and atomic proportion of all elements for x=0.15 ceramic.

According to a relationship established by Tunkasiri:  $E_b \propto 1/G^{-1/2}$ , the small grain size can increase  $E_b$  in ceramics<sup>17</sup>. The minimum grain size for x=0.15 ceramic is 0.98 μm, which offers a fundamental assurance for the improvement of  $E_b$ . All elements are distributed equally, which demonstrates a high degree of chemical uniformity.

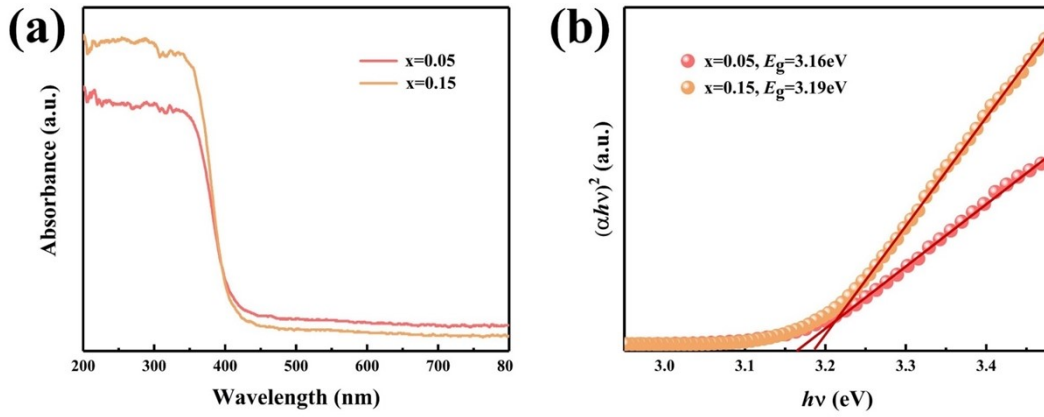

**Fig. S23** (a) UV-vis absorbance spectra and (b)  $(\alpha h\nu)^2$  vs  $h\nu$  plot for x=0.05 and x=0.15 ceramics.

The band gap ( $E_g$ ) can be obtained by the Tauc equation:

$$(\alpha h\nu)^2 = A(h\nu - E_g)^2 \quad (10)$$

where  $h\nu$ ,  $A$ , and  $\alpha$  represent photon energy, a constant, and absorption coefficient, respectively<sup>18</sup>. Having a wide  $E_g$  will prevent electrons jumping from the top of the valence band to the bottom of the conduction band<sup>11, 13</sup>.

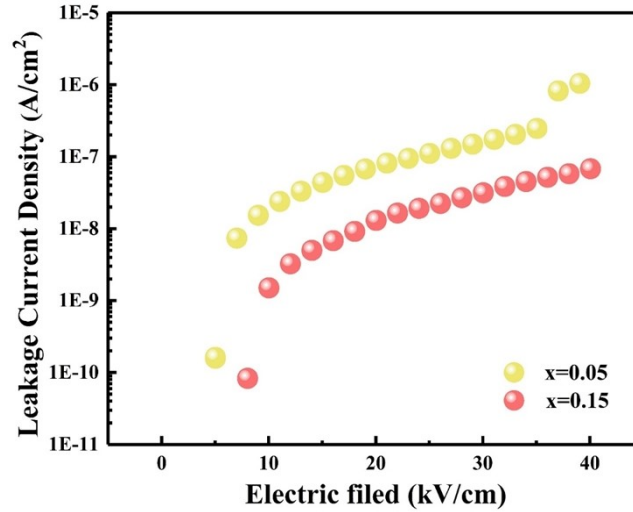

**Fig. S24** The leakage current density for x=0.05 and x=0.15 ceramics.

Fig. S24 shows the leakage current density for x=0.05 and x=0.15 ceramics. In general, the increased leakage current is a result of the increasing number and kinetic energy of charged carriers<sup>19,20</sup>. The low leakage current means the decreasing number and kinetic energy of charged carriers, which generates high  $E_b$  for dielectric materials. In this study, compared to x=0.05 ceramic, the x=0.15 ceramic exhibits reduced leakage current density resulted from fewer charge carriers, thus yielding great amplification of  $E_b$ <sup>21,22</sup>.

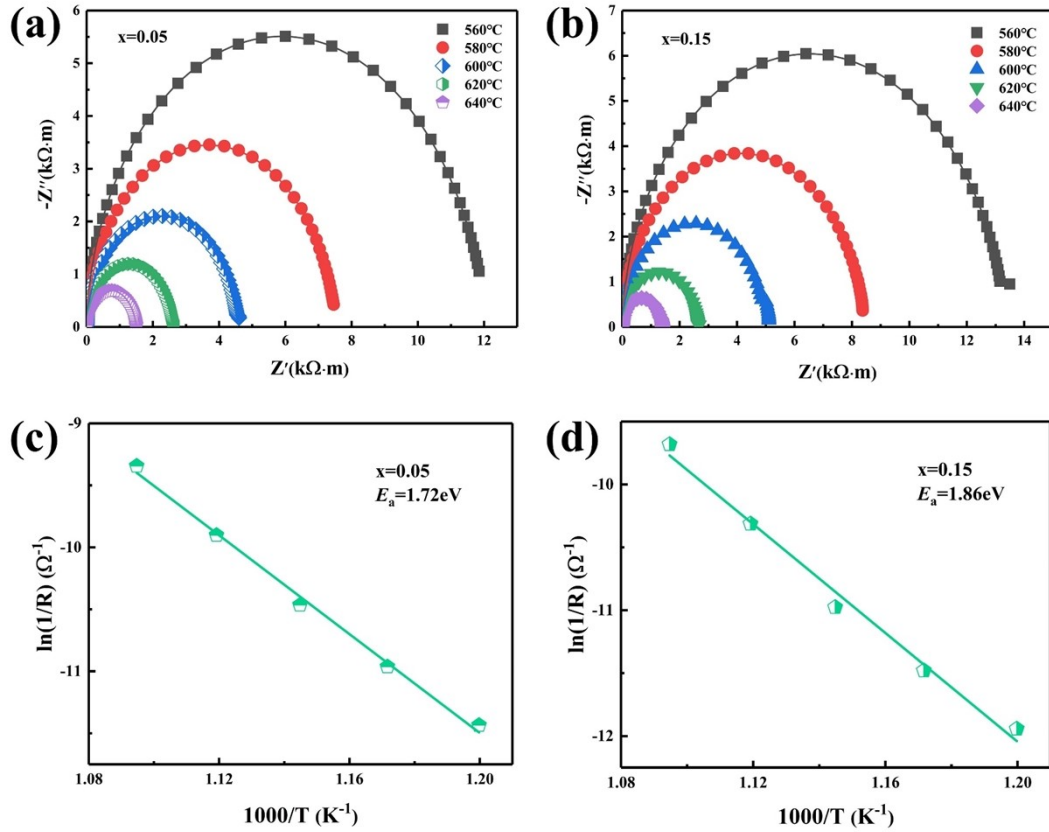

**Fig. S25** The complex impedance at various temperatures [(a) and (b)] and activation energy [(c) and (d)] for  $x=0.05$  and  $x=0.15$  ceramics.

The activation energy ( $E_a$ ) is calculated by Arrhenius formation <sup>23</sup>:

$$\sigma = \sigma_0 \exp\left(\frac{E_a}{kT}\right) \quad \#(11)$$

where  $\sigma_0$  represents the pre-exponent constant,  $\sigma$  ( $=1/\rho$  ( $\rho$  is resistivity)) indicates the bulk conductivity,  $k$  is the Boltzmann constant, and  $T$  is the Kelvin temperature. The  $E_a$  can be determined from the slope of  $\ln(1/R)-1000/T$ . Compared with  $x=0.05$  sample, the larger radius of the semicircle arc for impedance spectra can be observed in  $x=0.15$  ceramic (Fig. S25(a), (b)), demonstrating good electrical insulation characteristics. As shown in Fig. S25(c), (d), a higher  $E_a$  value ( $\sim 1.86$  eV) for the ceramic with  $x=0.15$  also confirms its strong electrical insulating properties arising from a lower oxygen vacancy concentration.

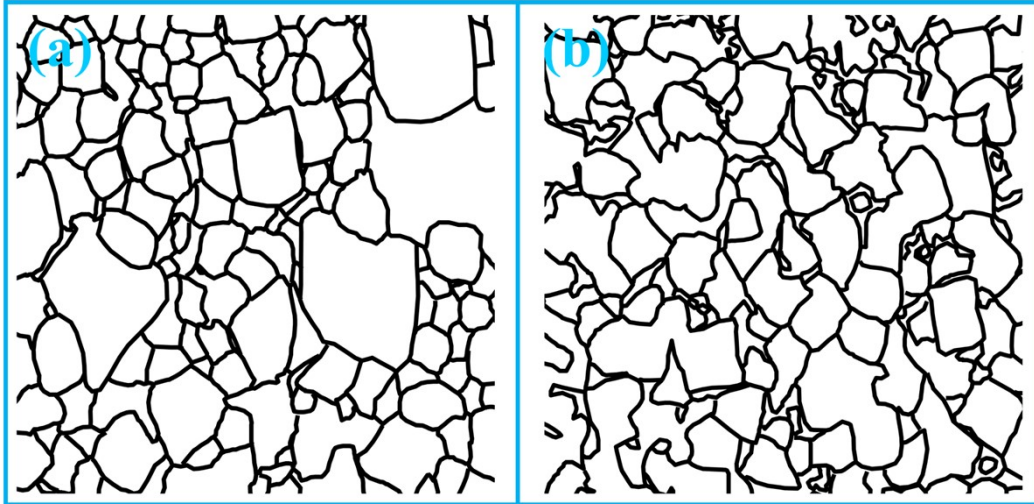

**Fig. S26** Simulation models for (a)  $x=0.05$  and (b)  $x=0.15$  ceramics.

To ensure the most realistic simulated results, the intrinsic (dielectric constant) and external (grain and grain boundary distribution) factors of the ceramics are mainly considered for the two-dimensional model.

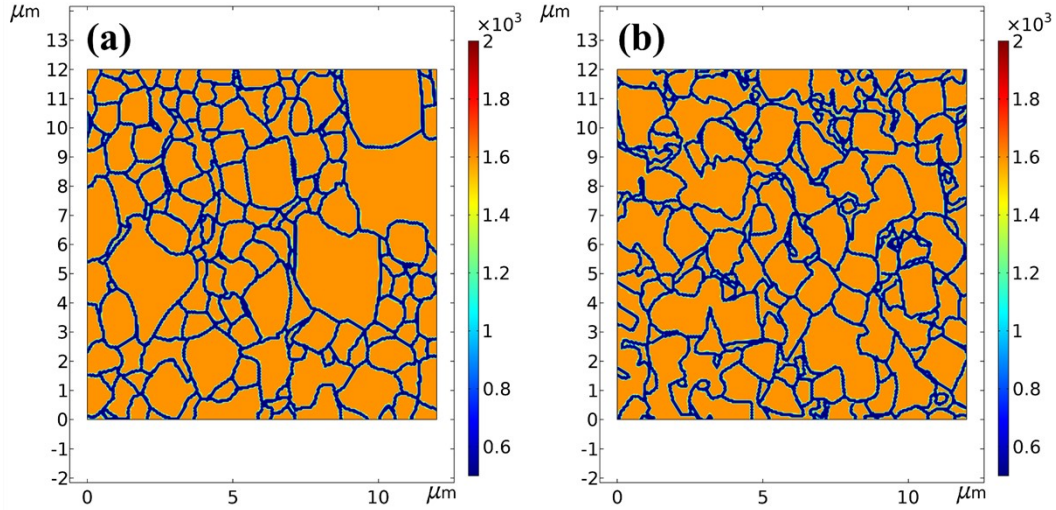

**Fig. S27** Distribution of dielectric constant for (a)  $x=0.05$  and (b)  $x=0.15$  ceramics.

The dielectric constant of the grain and grain boundary can be determined by the structural model proposed by Randall et al. <sup>3</sup>, which are expressed as follows:

$$\frac{1}{\varepsilon'} = \frac{1}{\varepsilon'_g} + \frac{1}{k\varepsilon'_{gb}} \quad \#(12)$$

where  $\varepsilon'$ ,  $\varepsilon'_g$  and  $\varepsilon'_{gb}$  represent the dielectric constant of the ceramics, grain and grain boundary, respectively. In this study, the region of  $12 \mu\text{m} \times 12 \mu\text{m}$  was chosen to establish the corresponding simulation model based on the SEM micrographs of the sample. In detail, a thickness is  $12 \mu\text{m}$  for samples, and a volage of  $420 \text{ V}$  ( $\sim 350 \text{ kV/cm}$ ) was applied to conduct the simulation.

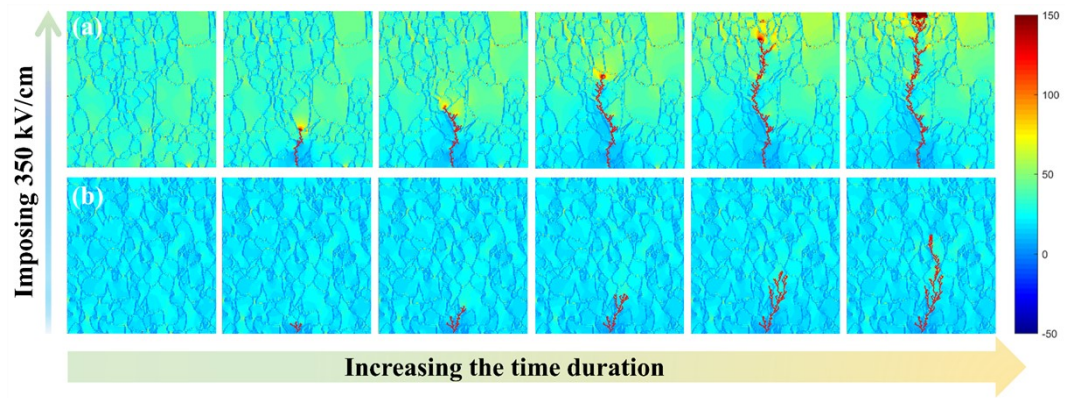

**Fig. S28** The polarization distribution with electric tree evolution for (a)  $x=0.05$  and (b)  $x=0.15$  ceramics.

**Table S1** A comparison of x=0.15 ceramic with recently reported lead-free ceramics on  $E_b$ ,  $W_{rec}$ ,  $\eta$ ,  $W_{rec}/E_b$ .

| <b>Compositions</b>                                                                                                                           | $E_b$<br>(kV/cm) | $W_{rec}$<br>(J/cm <sup>3</sup> ) | $\eta$<br>(%) | $W_{rec}/E_b$<br>( $\mu$ C/cm <sup>2</sup> ) | <b>Ref.</b> |
|-----------------------------------------------------------------------------------------------------------------------------------------------|------------------|-----------------------------------|---------------|----------------------------------------------|-------------|
| 0.9(Sr <sub>0.7</sub> Bi <sub>0.2</sub> )TiO <sub>3</sub> -<br>0.1Bi(Mg <sub>0.5</sub> Hf <sub>0.5</sub> )O <sub>3</sub>                      | 360              | 3.1                               | 93            | 0.00861                                      | 24          |
| SrTi <sub>0.985</sub> (Zn <sub>1/3</sub> Nb <sub>2/3</sub> ) <sub>0.015</sub> O <sub>3</sub> -4.5<br>wt%ZnNb <sub>2</sub> O <sub>6</sub>      | 422              | 2.35                              | 77            | 0.00557                                      | 25          |
| Sr <sub>0.92</sub> Dy <sub>0.08</sub> TiO <sub>3</sub>                                                                                        | 510              | 4                                 | 89.5          | 0.00784                                      | 26          |
| 0.8ST-0.2(NBT-<br>Ba <sub>0.94</sub> La <sub>0.04</sub> Zr <sub>0.02</sub> Ti <sub>0.98</sub> O <sub>3</sub> )                                | 320              | 2.83                              | 85            | 0.00884                                      | 27          |
| Sr <sub>0.7</sub> Bi <sub>0.2</sub> TiO <sub>3</sub>                                                                                          | 543              | 5.21                              | 91.55         | 0.00959                                      | 28          |
| 0.88SBT-0.12BNN                                                                                                                               | 580              | 5.98                              | 98.6          | 0.01031                                      | 13          |
| 0.98(SBT-BNT)-0.02BMT                                                                                                                         | 560              | 8                                 | 91            | 0.01429                                      | 29          |
| 0.2SNBCT                                                                                                                                      | 440              | 6                                 | 92            | 0.01364                                      | 30          |
| 0.43BiFeO <sub>3</sub> -0.45SrTiO <sub>3</sub> -<br>0.12BaTiO <sub>3</sub>                                                                    | 504              | 7.3                               | 86.3          | 0.01448                                      | 31          |
| 0.6BT-0.4Bi(Mg <sub>0.5</sub> Ti <sub>0.5</sub> )O <sub>3</sub>                                                                               | 340              | 4.49                              | 93            | 0.01321                                      | 32          |
| 0.65(Ba <sub>0.98</sub> Li <sub>0.04</sub> )Ti <sub>0.98</sub> O <sub>3</sub> -<br>0.35(Sr <sub>0.7</sub> Bi <sub>0.2</sub> )TiO <sub>3</sub> | 410              | 3.54                              | 75.6          | 0.00863                                      | 33          |
| 0.87BaTiO <sub>3</sub> -<br>0.13Bi(Zn <sub>2/3</sub> (Nb <sub>0.85</sub> Ta <sub>0.15</sub> ) <sub>1/3</sub> )O <sub>3</sub>                  | 790              | 5.04                              | 68            | 0.00638                                      | 34          |
| BT-BMZ@SiO <sub>2</sub>                                                                                                                       | 345              | 3.41                              | 85.1          | 0.00988                                      | 35          |
| BT-BZT-0.3BNT                                                                                                                                 | 230              | 4.18                              | 84.01         | 0.01817                                      | 36          |
| 0.85KNN-0.15Bi(Zn <sub>0.5</sub> Zr <sub>0.5</sub> )O <sub>3</sub>                                                                            | 326              | 3.5                               | 86.8          | 0.01074                                      | 37          |
| 0.85K <sub>0.5</sub> Na <sub>0.5</sub> NbO <sub>3</sub> -<br>0.15Bi(Zn <sub>2/3</sub> Ta <sub>1/3</sub> )O <sub>3</sub>                       | 600              | 6.7                               | 92            | 0.01117                                      | 38          |
| 0.80KNN-0.20ST                                                                                                                                | 400              | 3.67                              | 72.1          | 0.00917                                      | 39          |
| 0.90KNN-0.10BMN                                                                                                                               | 300              | 4.08                              | 62.7          | 0.0136                                       | 40          |



|                                                                                                    |     |      |       |         |    |
|----------------------------------------------------------------------------------------------------|-----|------|-------|---------|----|
| 0.9KNN-0.1BMN-1.0 mol                                                                              | 400 | 4.02 | 57.3  | 0.01005 | 41 |
| %CuO                                                                                               |     |      |       |         |    |
| Ag <sub>0.94</sub> La <sub>0.02</sub> NbO <sub>3</sub>                                             | 273 | 4.4  | 73    | 0.01612 | 42 |
| Ag <sub>0.88</sub> Gd <sub>0.04</sub> NbO <sub>3</sub>                                             | 290 | 4.5  | 64    | 0.01552 | 43 |
| Ag <sub>0.92</sub> Ca <sub>0.04</sub> NbO <sub>3</sub>                                             | 220 | 3.55 | 56.3  | 0.01614 | 44 |
| Ag <sub>0.91</sub> Sm <sub>0.03</sub> NbO <sub>3</sub>                                             | 290 | 5.2  | 68.5  | 0.01793 | 45 |
| Ag <sub>0.97</sub> Nd <sub>0.01</sub> Ta <sub>0.2</sub> Nb <sub>0.8</sub> O <sub>3</sub>           | 370 | 6.5  | 71    | 0.01757 | 46 |
| 0.45AgNbO <sub>3</sub> -0.55AgTaO <sub>3</sub>                                                     | 470 | 6.3  | 90    | 0.0134  | 11 |
| AgNbO <sub>3</sub>                                                                                 | 270 | 3.34 | 54.5  | 0.01237 | 47 |
| BiFeO <sub>3</sub> -BaTiO <sub>3</sub> -                                                           | 410 | 5.57 | 83.8  | 0.01359 | 48 |
| Na <sub>0.73</sub> Bi <sub>0.09</sub> NbO <sub>3</sub>                                             |     |      |       |         |    |
| 0.61BF-0.33BST-                                                                                    | 230 | 3.38 | 59    | 0.0147  | 49 |
| 0.06La(Mg <sub>2/3</sub> Nb <sub>1/3</sub> )O <sub>3</sub>                                         |     |      |       |         |    |
| 0.7(0.67BF-0.34BT)-                                                                                | 180 | 2.4  | 90.4  | 0.01333 | 50 |
| 0.3(Sr <sub>0.7</sub> Bi <sub>0.2</sub> )TiO <sub>3</sub>                                          |     |      |       |         |    |
| 0.57BF-0.30BT-0.13                                                                                 | 280 | 3.64 | 74    | 0.013   | 51 |
| Bi(Li <sub>0.5</sub> Nb <sub>0.5</sub> )O <sub>3</sub>                                             |     |      |       |         |    |
| 0.67Bi <sub>0.9</sub> Sm <sub>0.1</sub> FeO <sub>3</sub> -0.33BT                                   | 200 | 2.8  | 55.8  | 0.014   | 52 |
| Na <sub>0.7</sub> Bi <sub>0.1</sub> Nb <sub>0.9</sub> Ta <sub>0.1</sub> O <sub>3</sub>             | 530 | 7.33 | 83.68 | 0.01383 | 53 |
| 0.91NN-0.09Bi(Zn <sub>0.5</sub> Ti <sub>0.5</sub> )O <sub>3</sub>                                  | 250 | 2.2  | 62.7  | 0.0088  | 54 |
| (Na <sub>0.84</sub> Bi <sub>0.08</sub> )(Nb <sub>0.92</sub> Zr <sub>0.08</sub> )O <sub>3</sub> +Cu | 430 | 4.9  | 88    | 0.0114  | 55 |
| O                                                                                                  |     |      |       |         |    |
| 0.92NN-                                                                                            | 480 | 5.57 | 71    | 0.0116  | 56 |
| 0.08Bi(Mg <sub>0.5</sub> Ti <sub>0.5</sub> )O <sub>3</sub> +MnO <sub>2</sub>                       |     |      |       |         |    |
| (Na <sub>0.91</sub> La <sub>0.09</sub> )(Nb <sub>0.82</sub> Ti <sub>0.18</sub> )O <sub>3</sub>     | 550 | 6.5  | 66    | 0.01182 | 57 |
| 0.84NaNbO <sub>3</sub> -                                                                           | 380 | 5.29 | 82.1  | 0.01392 | 58 |
| 0.06BiFeO <sub>3</sub> -0.1SrTiO <sub>3</sub>                                                      |     |      |       |         |    |
| 0.9NaNbO <sub>3</sub> -0.1Bi(Zn <sub>0.5</sub> Sn <sub>0.5</sub> )O <sub>3</sub>                   | 350 | 3.14 | 83.3  | 0.00897 | 59 |
| 0.6(0.8Bi <sub>0.5</sub> Na <sub>0.4</sub> K <sub>0.1</sub> TiO <sub>3</sub> -                     | 260 | 4.44 | 81.8  | 0.01708 | 60 |

|                                                                                                                        |            |             |           |                |                      |
|------------------------------------------------------------------------------------------------------------------------|------------|-------------|-----------|----------------|----------------------|
| 0.2SrTiO <sub>3</sub> )-0.4NaNbO <sub>3</sub>                                                                          |            |             |           |                |                      |
| 0.75Bi <sub>0.58</sub> Na <sub>0.42</sub> TiO <sub>3</sub> -0.25ST                                                     | 535        | 5.63        | 94        | 0.01052        | 61                   |
| 0.62NBT-0.30SBT-0.08BMN                                                                                                | 470        | 7.5         | 92        | 0.01596        | 62                   |
| 0.9(0.75BNT-0.25ST)-<br>0.1Ag(Nb <sub>0.85</sub> Ta <sub>0.15</sub> )O <sub>3</sub>                                    | 290        | 3.6         | 80        | 0.01241        | 63                   |
| 0.78BNT-0.22NN                                                                                                         | 390        | 7.02        | 85        | 0.018          | 64                   |
| 0.8BNT-0.2NaTaO <sub>3</sub>                                                                                           | 380        | 4.21        | 77.8      | 0.01108        | 65                   |
| 0.80Bi <sub>0.5</sub> Na <sub>0.5</sub> TiO <sub>3</sub> -<br>0.20SrNb <sub>0.5</sub> Al <sub>0.5</sub> O <sub>3</sub> | 565        | 7           | 95        | 0.01239        | 66                   |
| 0.85Bi <sub>0.5</sub> Na <sub>0.5</sub> TiO <sub>3</sub> -<br>0.15AgNb <sub>0.5</sub> Ta <sub>0.5</sub> O <sub>3</sub> | 518        | 6.6         | 72        | 0.01274        | 15                   |
| 0.88(0.65Bi <sub>0.5</sub> Na <sub>0.5</sub> TiO <sub>3</sub> -<br>0.35SrTiO <sub>3</sub> )-                           | 390        | 5.59        | 85.3      | 0.01433        | 16                   |
| 0.12Bi(Mg <sub>0.5</sub> Hf <sub>0.5</sub> )O <sub>3</sub>                                                             |            |             |           |                |                      |
| BNT-BT-0.12La                                                                                                          | 440        | 6.69        | 87        | 0.0152         | 67                   |
| 0.9BNT-0.1LiTaO <sub>3</sub>                                                                                           | 200        | 3.1         | 74.2      | 0.0155         | 68                   |
| BNT-BAT-0.15BMN                                                                                                        | 420        | 6.3         | 79.6      | 0.015          | 69                   |
| BNT-BAT-0.7SBNLT                                                                                                       | 200        | 2.03        | 72        | 0.01015        | 70                   |
| (Ca <sub>0.5</sub> Sr <sub>0.5</sub> ) <sub>0.8875</sub> La <sub>0.075</sub> TiO <sub>3</sub>                          | 370        | 2.07        | 93        | 0.00559        | 71                   |
| Ca <sub>0.5</sub> Sr <sub>0.5</sub> Ti <sub>0.85</sub> Zr <sub>0.15</sub> O <sub>3</sub>                               | 440        | 3.37        | 96        | 0.00766        | 72                   |
| 0.6BKT-0.3BT-0.1NN                                                                                                     | 460        | 7.57        | 81.4      | 0.01646        | 8                    |
| 0.76BKT-0.24BF                                                                                                         | 150        | 2.88        | 76.9      | 0.0192         | 73                   |
| BKTBFO-0.16NSN                                                                                                         | 425        | 6.52        | 70        | 0.01534        | 74                   |
| BKT-0.15BMN                                                                                                            | 230        | 3.14        | 83.7      | 0.01365        | 75                   |
| <b>BNT-BAT-0.15NT</b>                                                                                                  | <b>420</b> | <b>6.82</b> | <b>90</b> | <b>0.01624</b> | <b>This<br/>work</b> |

**Table S2** A comparison of temperature stability between this work and other recently reported lead-free ceramics.

| Num. | Compositions                                           | Temperature<br>e (°C) | $W_{\text{rec}}$<br>(J/cm <sup>3</sup> ) | Ref.             |
|------|--------------------------------------------------------|-----------------------|------------------------------------------|------------------|
| 1    | Ba <sub>0.82</sub> Bi <sub>0.12</sub> TiO <sub>3</sub> | 30-120                | 3.21-3.35                                | 76               |
| 2    | KNN-H                                                  | 25-140                | 3.18-3.58                                | 9                |
| 3    | CT-0.2(BNT-BAT)                                        | 20-160                | 3.9-4.3                                  | 77               |
| 4    | BNT-BT-0.12La                                          | 25-180                | 1.49-1.73                                | 67               |
| 5    | BT-BMZ@SiO <sub>2</sub>                                | 30-150                | 2.68-2.74                                | 35               |
| 6    | 0.78NN-0.22BMT                                         | 20-200                | 2.11-2.29                                | 78               |
| 7    | 0.76KBT-0.24BF                                         | 20-160                | 1.222-1.357                              | 73               |
| 8    | NKSN-SZ-0.14BNZ                                        | 0-200                 | 3.3-3.46                                 | 79               |
| 9    | BF-BT-0.3SST                                           | 25-110                | 0.62-0.652                               | 80               |
| 10   | 0.6BKT-0.3BT-0.1NN                                     | 20-200                | 4.06-4.58                                | 8                |
| 11   | <b>BNT-BAT-0.15NT</b>                                  | <b>20-160</b>         | <b>3.35-3.73</b>                         | <b>This work</b> |

**Table S3** A comparison of  $W_D$ ,  $P_D$ , and  $t_{0.9}$  among this work and other recently reported lead-free ceramics.

| <b>Compositions</b>                 | $W_D$<br>(J/cm <sup>3</sup> ) | $P_D$<br>(MW/cm <sup>3</sup> ) | $t_{0.9}$<br>(ns) | <b>Ref.</b>      |
|-------------------------------------|-------------------------------|--------------------------------|-------------------|------------------|
| NN-BMT                              | 1.17                          | 63.7                           | 85                | 56               |
| BNT-BAT-CT                          | 0.72                          | 96.2                           | 37.6              | 21               |
| BNT-SLT                             | 2.31                          | 182                            | 123               | 81               |
| NN-BMN                              | 0.47                          | 47.6                           | 45                | 82               |
| SBKT+Er <sub>2</sub> O <sub>3</sub> | 1.51                          | 39.6                           | 325               | 83               |
| NN-CT                               | 0.88                          | 114.8                          | 45                | 84               |
| BNT-LT                              | 0.51                          | 22                             | 100               | 68               |
| SBT-KBT                             | 1.81                          | 49.5                           | 360               | 85               |
| BNST-STZ                            | 1.17                          | 41.2                           | 125.6             | 86               |
| <b>BNT-BAT-0.15NT</b>               | <b>1.69</b>                   | <b>122</b>                     | <b>97</b>         | <b>This Work</b> |

**Table S4** Multidimensional comparisons of comprehensive properties including  $W_{\text{rec}}$ ,  $\eta$ ,  $W_{\text{rec}}/E_b$ , thermal, and frequency stability between this work and representative lead-free energy storage ceramics with superior comprehensive performance.

| Compositions               | $W_{\text{rec}}$<br>(J/cm <sup>3</sup> ) | $\eta$<br>(%) | $W_{\text{rec}}/E_b$<br>( $\mu\text{C}/\text{cm}^2$ ) | Temperatur<br>e (°C) | Frequenc<br>y<br>(Hz) | Ref.                 |
|----------------------------|------------------------------------------|---------------|-------------------------------------------------------|----------------------|-----------------------|----------------------|
| KNN-BZT                    | 6.7                                      | 92            | 0.01117                                               | 25-150               | 1-100                 | 38                   |
| BKT-BT-NN                  | 7.57                                     | 81.4          | 0.01646                                               | 20-200               | 5-100                 | 8                    |
| AN-AT                      | 6.3                                      | 90            | 0.0134                                                | 20-150               |                       | 11                   |
| NN-BF-ST                   | 5.29                                     | 82.1          | 0.01392                                               | 20-120               | 1-200                 | 58                   |
| BF-BST-BZN                 | 7.4                                      | 81            | 0.01088                                               | 30-130               | 1-200                 | 87                   |
| <b>BNT-BAT-<br/>0.15NT</b> | <b>6.82</b>                              | <b>90</b>     | <b>0.01624</b>                                        | <b>20-160</b>        | <b>1-500</b>          | <b>This<br/>work</b> |

## References

1. H. Pan, J. Ma, J. Ma, Q. Zhang, X. Liu, B. Guan, L. Gu, X. Zhang, Y.-J. Zhang, L. Li, Y. Shen, Y.-H. Lin and C.-W. Nan, *Nat. Commun.*, 2018, **9**, 1813.
2. H. Bai, K. Zhu, Z. Wang, B. Shen and J. Zhai, *Adv. Funct. Mater.*, 2021, **31**, 2102646.
3. F. Yan, H. Bai, G. Ge, J. Lin, C. Shi, K. Zhu, B. Shen, J. Zhai and S. Zhang, *Small*, 2022, **18**, 2106515.
4. Y. Gao, X. Zhu, B. Yang, P. Shi, R. Kang, Y. Yuan, Q. Liu, M. Wu, J. Gao and X. Lou, *Chem. Eng. J.*, 2022, **433**, 133584.
5. X. Zhu, Y. Gao, P. Shi, R. Kang, F. Kang, W. Qiao, J. Zhao, Z. Wang, Y. Yuan and X. Lou, *Nano Energy*, 2022, **98**, 107276.
6. H. Pan, S. Lan, S. Xu, Q. Zhang, H. Yao, Y. Liu, F. Meng, E.-J. Guo, L. Gu, D. Yi, X. Renshaw Wang, H. Huang, J. L. MacManus-Driscoll, L.-Q. Chen, K.-J. Jin, C.-W. Nan and Y.-H. Lin, *Science*, 2021, **374**, 100-104.
7. L. Yang, X. Kong, F. Li, H. Hao, Z. Cheng, H. Liu, J.-F. Li and S. Zhang, *Prog. Mater. Sci.*, 2019, **102**, 72-108.
8. L. Chen, F. Long, H. Qi, H. Liu, S. Deng and J. Chen, *Adv. Funct. Mater.*, 2022, **32**, 2110478.
9. L. Chen, S. Deng, H. Liu, J. Wu, H. Qi and J. Chen, *Nat. Commun.*, 2022, **13**, 3089.
10. J. Li, Z. Shen, X. Chen, S. Yang, W. Zhou, M. Wang, L. Wang, Q. Kou, Y. Liu, Q. Li, Z. Xu, Y. Chang, S. Zhang and F. Li, *Nat. Mater.*, 2020, **19**, 999-1005.
11. N. Luo, K. Han, M. J. Cabral, X. Liao, S. Zhang, C. Liao, G. Zhang, X. Chen, Q. Feng, J.-F. Li and Y. Wei, *Nat. Commun.*, 2020, **11**, 4824.
12. A. Xie, R. Zuo, Z. Qiao, Z. Fu, T. Hu and L. Fei, *Adv. Energy Mater.*, 2021, **11**, 2101378.
13. J. Liu, Y. Ding, C. Li, W. Bai, P. Zheng, S. Wu, J. Zhang, Z. Pan and J. Zhai, *J. Mater. Chem. A*, 2023, **11**, 609-620.
14. Z.-N. Guan, Y. Yan, J. Ma, T. Pan, X. Li, S. Guo, J. Zhang, J. Wang and Y. Wang, *ACS Appl. Mater. Interfaces*, 2022, **14**, 44539-44549.
15. Z. Che, L. Ma, G. Luo, C. Xu, Z. Cen, Q. Feng, X. Chen, K. Ren and N. Luo,

- Nano Energy*, 2022, **100**, 107484.
16. X. Zhu, P. Shi, Y. Gao, R. Kang, J. Zhao, A. Xiao, W. Qiao, J. Zhao, Z. Wang and X. Lou, *Chem. Eng. J.*, 2022, **437**, 135462.
  17. T. Tunkasiri and G. Rujijanagul, *J Mater Sci Lett*, 1996, **15**, 1767-1769.
  18. C. Pascual-Gonzalez, G. Schileo, S. Murakami, A. Khesro, D. Wang, I. M. Reaney and A. Feteira, *Appl. Phys. Lett.*, 2017, **110**, 172902.
  19. H. Pan, F. Li, Y. Liu, Q. Zhang, M. Wang, S. Lan, Y. Zheng, J. Ma, L. Gu, Y. Shen, P. Yu, S. Zhang, L.-Q. Chen, Y.-H. Lin and C.-W. Nan, *Science*, 2019, **365**, 578-582.
  20. B. Yang, Y. Zhang, H. Pan, W. Si, Q. Zhang, Z. Shen, Y. Yu, S. Lan, F. Meng, Y. Liu, H. Huang, J. He, L. Gu, S. Zhang, L.-Q. Chen, J. Zhu, C.-W. Nan and Y.-H. Lin, *Nat. Mater.*, 2022, **21**, 1074-1080.
  21. C. Li, J. Liu, W. Bai, S. Wu, P. Zheng, J. Zhang, Z. Pan and J. Zhai, *J. Mater. Chem. A*, 2022, **10**, 9535-9546.
  22. C. Kim, G. Pilia and R. Ramprasad, *Journal of Physical Chemistry C*, 2016, **120**, 14575-14580.
  23. K. J. Laidler, *J Chem Educ*, 1984, **61**, 494.
  24. X. Kong, L. Yang, Z. Cheng and S. Zhang, *J. Am. Ceram. Soc.*, 2020, **103**, 1722-1731.
  25. W. Pan, M. Cao, A. Jan, H. Hao, Z. Yao and H. Liu, *J. Mater. Chem. C*, 2020, **8**, 2019-2027.
  26. X. Guo, Y. Pu, W. Wang, J. Ji, J. Li, R. Shi and M. Yang, *Ceram. Int.*, 2020, **46**, 21719-21727.
  27. H. Yang, F. Yan, Y. Lin and T. Wang, *ACS Sustain. Chem. Eng.*, 2017, **5**, 10215-10222.
  28. C. Zuo, S. Yang, Z. Cao, H. Yu and X. Wei, *Chem. Eng. J.*, 2022, **442**, 136330.
  29. Z. Wang, R. Kang, Z. Hong, X. Ke, X. Lou, L. Zhang, L. Zhang and J. Wang, *ACS Appl. Mater. Interfaces*, 2022, **14**, 44389-44397.
  30. L. Liu, Y. Liu, J. Hao, J. Chen, P. Li, S. Chen, P. Fu, W. Li and J. Zhai, *Nano Energy*, 2023, **109**, 108275.

31. T. Cui, A. Yu, Y. Zhang, J. Guo, X. Li, S. Guo, J. Zhang, J. Wang and S.-T. Zhang, *J. Am. Ceram. Soc.*, 2022, **105**, 6252-6261.
32. Q. Hu, Y. Tian, Q. Zhu, J. Bian, L. Jin, H. Du, D. O. Alikin, V. Y. Shur, Y. Feng, Z. Xu and X. Wei, *Nano Energy*, 2020, **67**, 104264.
33. G. Liu, Y. Li, B. Guo, M. Tang, Q. Li, J. Dong, L. Yu, K. Yu, Y. Yan, D. Wang, L. Zhang, H. Zhang, Z. He and L. Jin, *Chem. Eng. J.*, 2020, **398**, 125625.
34. Z. Cai, C. Zhu, H. Wang, P. Zhao, Y. Yu, L. Li and X. Wang, *J. Mater. Chem. A*, 2019, **7**, 17283-17291.
35. Q. Yuan, F.-Z. Yao, S.-D. Cheng, L. Wang, Y. Wang, S.-B. Mi, Q. Wang, X. Wang and H. Wang, *Adv. Funct. Mater.*, 2020, **30**, 2000191.
36. W. Qin, M. Zhao, Z. Li, D. Zhang, M. Zhang, Y. Xu, L. Jin and Y. Yan, *Chem. Eng. J.*, 2022, **443**, 136505.
37. M. Zhang, H. Yang, D. Li, L. Ma and Y. Lin, *J. Mater. Chem. C*, 2020, **8**, 8777-8785.
38. D. Li, D. Zhou, D. Wang, W. Zhao, Y. Guo and Z. Shi, *Adv. Funct. Mater.*, 2022, **32**, 2111776.
39. Z. Yang, H. Du, S. Qu, Y. Hou, H. Ma, J. Wang, J. Wang, X. Wei and Z. Xu, *J. Mater. Chem. A*, 2016, **4**, 13778-13785.
40. T. Shao, H. Du, H. Ma, S. Qu, J. Wang, J. Wang, X. Wei and Z. Xu, *J. Mater. Chem. A*, 2017, **5**, 554-563.
41. X. Lu, L. Zhang, H. Talebinezhad, Y. Tong and Z. Y. Cheng, *Ceram. Int.*, 2018, **44**, 16977-16983.
42. J. Gao, Y. Zhang, L. Zhao, K.-Y. Lee, Q. Liu, A. Studer, M. Hinterstein, S. Zhang and J.-F. Li, *J. Mater. Chem. A*, 2019, **7**, 2225-2232.
43. S. Li, H. Nie, G. Wang, C. Xu, N. Liu, M. Zhou, F. Cao and X. Dong, *J. Mater. Chem. C*, 2019, **7**, 1551-1560.
44. N. Luo, K. Han, F. Zhuo, L. Liu, X. Chen, B. Peng, X. Wang, Q. Feng and Y. Wei, *J. Mater. Chem. C*, 2019, **7**, 4999-5008.
45. N. Luo, K. Han, F. Zhuo, C. Xu, G. Zhang, L. Liu, X. Chen, C. Hu, H. Zhou and Y. Wei, *J. Mater. Chem. A*, 2019, **7**, 14118-14128.



46. Z. Lu, W. Bao, G. Wang, S.-K. Sun, L. Li, J. Li, H. Yang, H. Ji, A. Feteira, D. Li, F. Xu, A. K. Kleppe, D. Wang, S.-Y. Liu and I. M. Reaney, *Nano Energy*, 2021, **79**, 105423.
47. J. Huang, X. Hou, S. Gao, Y. Zhou, H. Huang, Y. He and Q. Zhang, *J. Mater. Chem. A*, 2022, **10**, 16337-16350.
48. F. Yan, Y. Shi, X. Zhou, K. Zhu, B. Shen and J. Zhai, *Chem. Eng. J.*, 2021, **417**, 127945.
49. H. Yang, H. Qi and R. Zuo, *J. Eur. Ceram. Soc.*, 2019, **39**, 2673-2679.
50. Z. Chen, X. Bu, B. Ruan, J. Du, P. Zheng, L. Li, F. Wen, W. Bai, W. Wu, L. Zheng and Y. Zhang, *J. Eur. Ceram. Soc.*, 2020, **40**, 5450-5457.
51. G. Wang, Z. Lu, H. Yang, H. Ji, A. Mostaed, L. Li, Y. Wei, A. Feteira, S. Sun, D. C. Sinclair, D. Wang and I. M. Reaney, *J. Mater. Chem. A*, 2020, **8**, 11414-11423.
52. Z. Chen, X. Bai, H. Wang, J. Du, W. Bai, L. Li, F. Wen, P. Zheng, W. Wu, L. Zheng and Y. Zhang, *Ceram. Int.*, 2020, **46**, 11549-11555.
53. W. Yang, H. Zeng, F. Yan, J. Lin, G. Ge, Y. Cao, W. Du, K. Zhao, G. Li, H. Xie and J. Zhai, *J. Mater. Chem. A*, 2022, **10**, 11613-11624.
54. Y. Fan, Z. Zhou, R. Liang and X. Dong, *J. Eur. Ceram. Soc.*, 2019, **39**, 4770-4777.
55. L. Yang, X. Kong, Z. Cheng and S. Zhang, *ACS Appl. Mater. Interfaces*, 2020, **12**, 32834-32841.
56. A. Tian, R. Zuo, H. Qi and M. Shi, *J. Mater. Chem. A*, 2020, **8**, 8352-8359.
57. J. Chen, H. Qi and R. Zuo, *ACS Appl. Mater. Interfaces*, 2020, **12**, 32871-32879.
58. X. Wang, X. Wang, Y. Huan, C. Li, J. Ouyang and T. Wei, *ACS Appl. Mater. Interfaces*, 2022, **14**, 9330-9339.
59. X. Dong, X. Li, H. Chen, Q. Dong, J. Wang, X. Wang, Y. Pan, X. Chen and H. Zhou, *J. Adv. Ceram.*, 2022, **11**, 729-741.
60. W. Shi, Y. Yang, L. Zhang, R. Jing, Q. Hu, D. O. Alikin, V. Y. Shur, J. Gao, X. Wei and L. Jin, *Ceram. Int.*, 2022, **48**, 6512-6519.
61. F. Yan, K. Huang, T. Jiang, X. Zhou, Y. Shi, G. Ge, B. Shen and J. Zhai, *Energy Stor. Mater.*, 2020, **30**, 392-400.
62. H. Ji, D. Wang, W. Bao, Z. Lu, G. Wang, H. Yang, A. Mostaed, L. Li, A. Feteira,

- S. Sun, F. Xu, D. Li, C.-J. Ma, S.-Y. Liu and I. M. Reaney, *Energy Stor. Mater.*, 2021, **38**, 113-120.
63. T. Li, P. Chen, F. Li and C. Wang, *Chem. Eng. J.*, 2021, **406**, 127151.
64. H. Qi and R. Zuo, *J. Mater. Chem. A*, 2019, **7**, 3971-3978.
65. X. Zhou, H. Qi, Z. Yan, G. Xue, H. Luo and D. Zhang, *ACS Appl. Mater. Interfaces*, 2019, **11**, 43107-43115.
66. F. Yan, H. Bai, G. Ge, J. Lin, K. Zhu, G. Li, J. Qian, B. Shen, J. Zhai and Z. Liu, *Small*, 2022, **18**, 2202575.
67. B. Chu, J. Hao, P. Li, Y. Li, W. Li, L. Zheng and H. Zeng, *ACS Appl. Mater. Interfaces*, 2022, **14**, 19683-19696.
68. L. Zhang, Y. Pu, M. Chen, T. Wei and X. Peng, *Chem. Eng. J.*, 2020, **383**, 123154.
69. B. Guo, Y. Yan, M. Tang, Z. Wang, Y. Li, L. Zhang, H. Zhang, L. Jin and G. Liu, *Chem. Eng. J.*, 2021, **420**, 130475.
70. J. Liu, Y. Ding, C. Li, W. Bai, P. Zheng, J. Zhang and J. Zhai, *J. Mater. Sci. Mater. Electron.*, 2021, **32**, 21164-21177.
71. W. Wang, Y. Pu, X. Guo, T. Ouyang, Y. Shi, M. Yang, J. Li, R. Shi and G. Liu, *Ceram. Int.*, 2019, **45**, 14684-14690.
72. Y. Pu, W. Wang, X. Guo, R. Shi, M. Yang and J. Li, *J. Mater. Chem. C*, 2019, **7**, 14384-14393.
73. Q. Yang, M. Zhu, Q. Wei, M. Zhang, M. Zheng and Y. Hou, *Chem. Eng. J.*, 2021, **414**, 128769.
74. H. Wang, E. Li, K. Wei, H. Li, M. Xing and C. Zhong, *ACS Appl. Mater. Interfaces*, 2022, **14**, 54021-54033.
75. F. Li, X. Hou, T. Li, R. Si, C. Wang and J. Zhai, *J. Mater. Chem. C*, 2019, **7**, 12127-12138.
76. Z. Sun, J. Zhang, H. Luo, Y. Yao, N. Wang, L. Chen, T. Li, C. Hu, H. Qi, S. Deng, L. C. Gallington, Y. Zhang, J. C. Neufeind, H. Liu and J. Chen, *J. Am. Chem. Soc.*, 2023, **145**, 6194-6202.
77. C. Li, J. Liu, L. Lin, W. Bai, S. Wu, P. Zheng, J. Zhang and J. Zhai, *Small*, 2023, **19**, 2206662.

78. J. Shi, X. Chen, X. Li, J. Sun, C. Sun, F. Pang and H. Zhou, *J. Mater. Chem. C*, 2020, **8**, 3784-3794.
79. A. Xie, J. Fu, R. Zuo, X. Jiang, T. Li, Z. Fu, Y. Yin, X. Li and S. Zhang, *Adv. Mater.*, 2022, **34**, 2204356.
80. S. Liu, W. Feng, J. Li, B. He, M. Liu, Z. Bao, D. Luo and C. Zhao, *J. Eur. Ceram. Soc.*, 2022, **42**, 7430-7440.
81. X. Qiao, F. Zhang, D. Wu, B. Chen, X. Zhao, Z. Peng, X. Ren, P. Liang, X. Chao and Z. Yang, *Chem. Eng. J.*, 2020, **388**, 124158.
82. C. Sun, X. Chen, J. Shi, F. Pang, X. Dong, H. y. Chen, K. Wang, X. Zhou and H. Zhou, *J. Eur. Ceram. Soc.*, 2021, **41**, 1891-1903.
83. P. Zhao, B. Tang, Z. Fang, F. Si, C. Yang and S. Zhang, *Chem. Eng. J.*, 2021, **403**, 126290.
84. J. Liu, P. Li, C. Li, W. Bai, S. Wu, P. Zheng, J. Zhang and J. Zhai, *ACS Appl. Mater. Interfaces*, 2022, **14**, 17662-17673.
85. P. Zhao, B. Tang, Z. Fang, F. Si, C. Yang, G. Liu and S. Zhang, *J. Materiomics*, 2021, **7**, 195-207.
86. D. Li, Y. Lin, M. Zhang and H. Yang, *Chem. Eng. J.*, 2020, **392**, 123729.
87. J. Zhao, T. Hu, Z. Fu, Z. Pan, L. Tang, X. Chen, H. Li, J. Hu, L. Lv, Z. Zhou, J. Liu, P. Li and J. Zhai, *Small*, 2023, **19**, 2206840.
